# Supplementary material for: Variability of aerosol properties over Eastern Europe observed from ground and satellites in the period from 2003 to 2011
Source: Copernicus journal article supplement (doi:10.5194/acp-13-6587-2013), 2013-07-11
Supplement: Supplementary file 1 [file acp-13-6587-2013-supplement.pdf]

## Supplementary Material

“Variability of aerosol properties over Eastern Europe observed from ground and satellites in the period from 2003 to 2011”

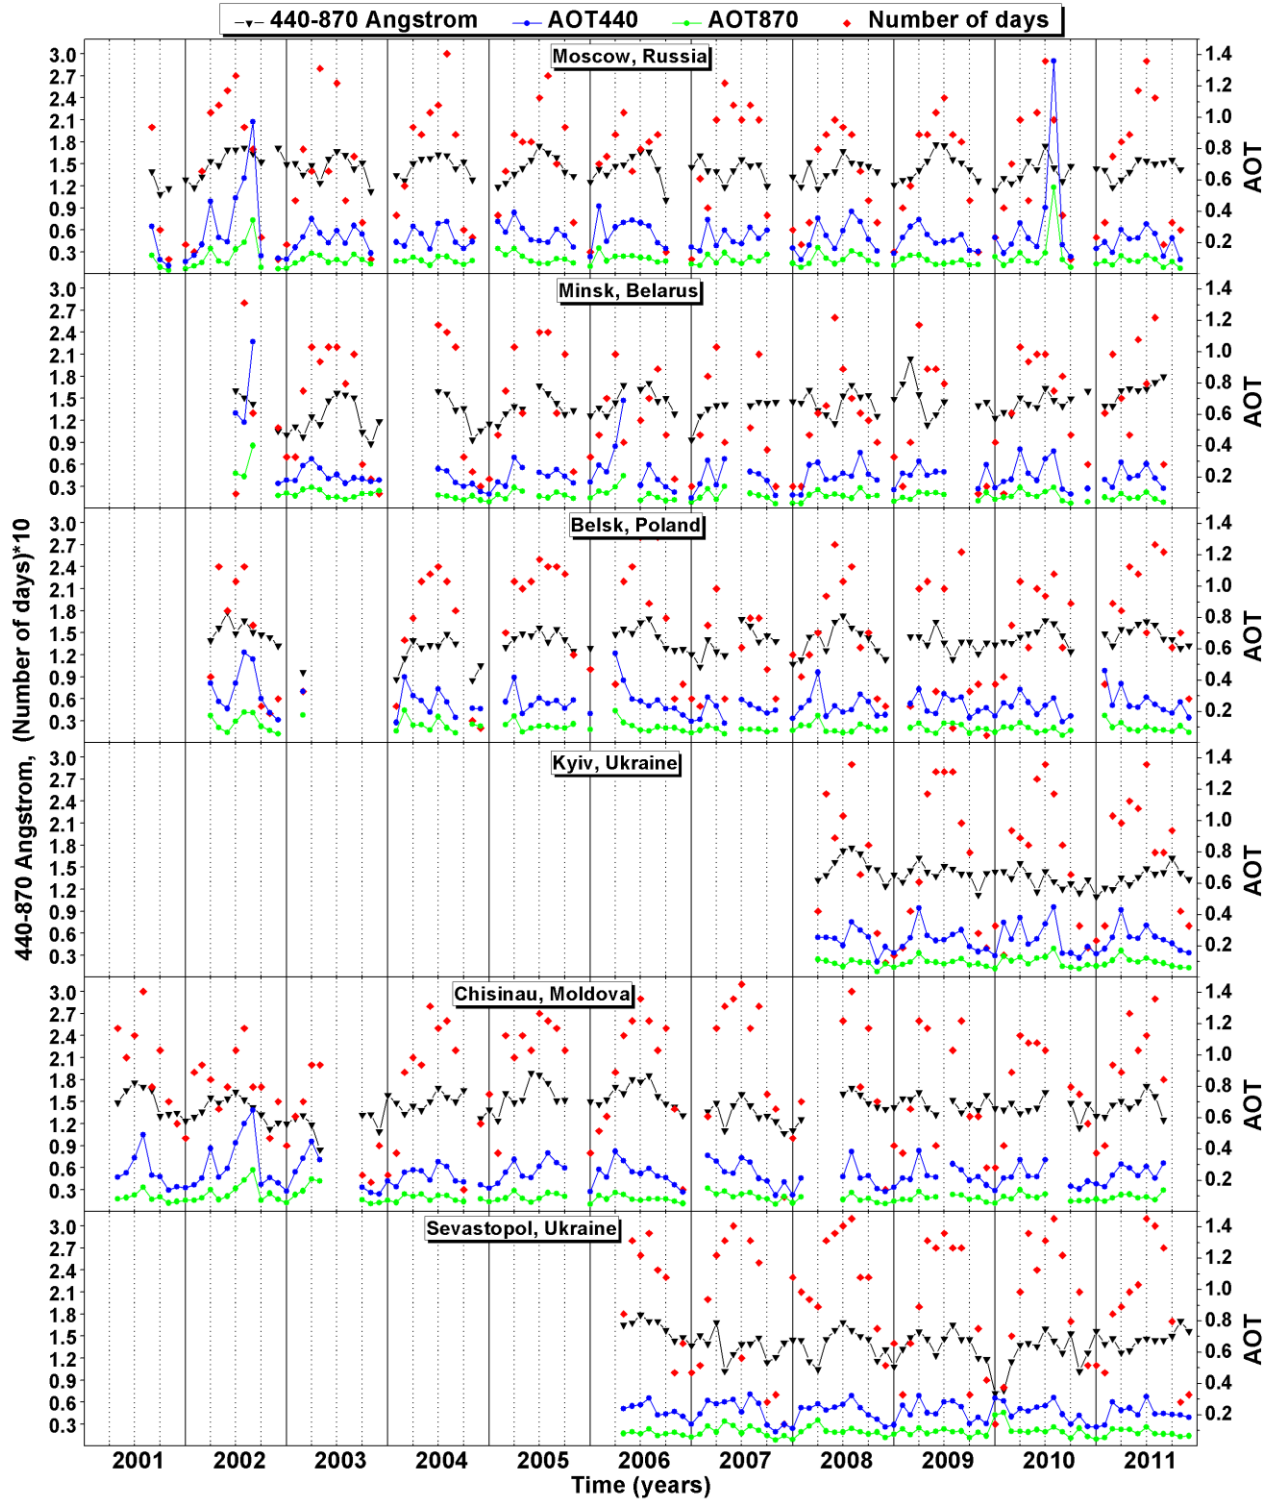

**Fig. S1.** Monthly mean AOT at 440, 870 nm, Ångström exponent computed from 440 to 870 nm and number of days with retrievals for 2001 – 2011 from Moscow, Minsk, Belsk, Kyiv, Moldova and Sevastopol sunphotometers. Each year is divided into four equally region: the first dashed line correspond to April, the second – July, the third – October, and solid line – January.

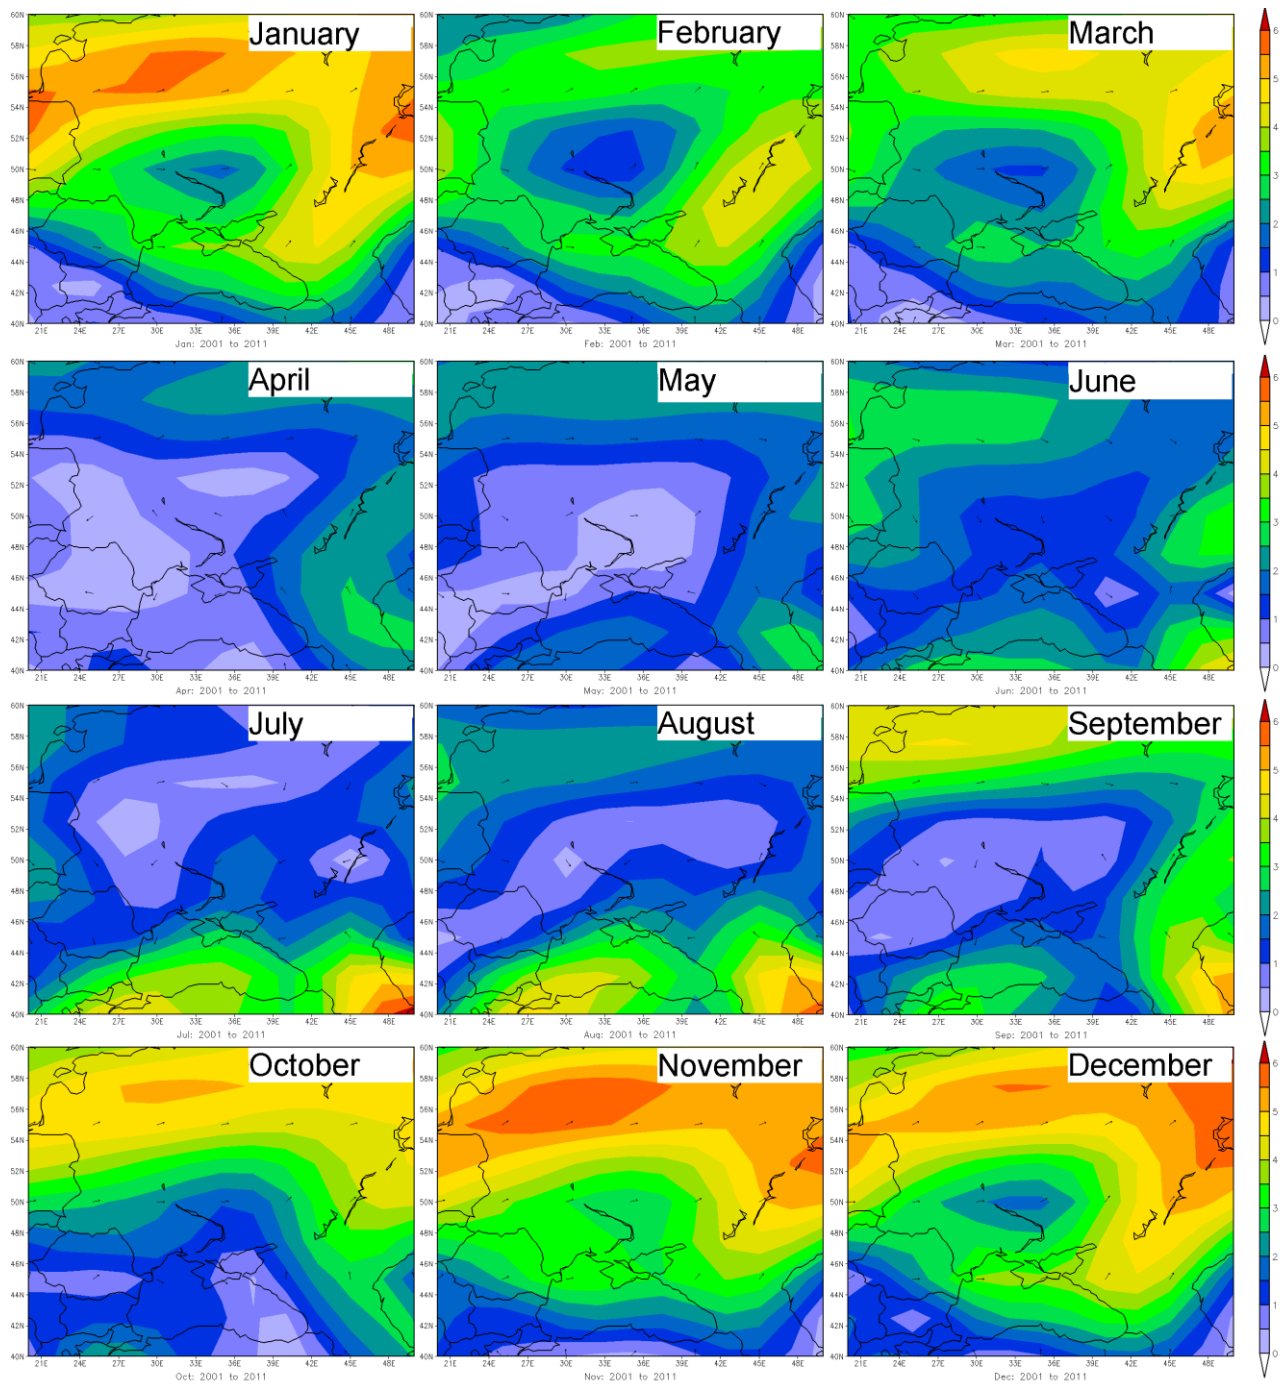

**Fig. S2.** Wind fields at 925 hPa over Eastern Europe for the period 2001 – 2011

The southwest and west winds dominate in January, south and southwest – in February and March, south over Black Sea and Ukraine and southwest over Russia and Belarus – in April. The southeast wind dominates over Ukraine and Belarus while over northwest Russia the southwest wind prevails in May, north and northeast – in June and July. The west wind blows in August–September in the northern part of the region under study particularly in Belarus and northwest Russia while the east wind from the Caucasus meets with the west wind and produces a north and northeast wind over south Ukraine, the Black and Azov Seas. The west and southwest wind predominates in October–December.
